# Supplementary material for: CONSTANS is a photoperiod regulated activator of flowering in sorghum
Source: PubMed Central journal article supplement (PMC4046011; doi:10.1186/1471-2229-14-148), 2014-05-28
Supplement: 1471-2229-14-148-S4.pdf [file 1471-2229-14-148-S4.pdf]

**Table S2. Orthologs of sorghum *FT/CN* genes (*SbCN*) identified in maize and rice.**

| <b>Sorghum Gene</b> | <b>Locus ID in Sorghum*</b> | <b>Location</b>               | <b>Maize Gene</b> | <b>Locus ID in Maize</b> | <b>Rice Gene</b>               | <b>Locus ID in Rice</b> |
|---------------------|-----------------------------|-------------------------------|-------------------|--------------------------|--------------------------------|-------------------------|
| <i>SbCN8</i>        | Sb09g025760                 | chr_9: 55149243<br>- 55150558 | <i>ZCN8</i>       | GRMZM2G179264            | <i>FTL10</i>                   | LOC_Os05g44180          |
| <i>SbCN12</i>       | Sb03g034580                 | chr_3: 62753997<br>- 62755638 | <i>ZCN12</i>      | GRMZM2G103666            | <i>FTL9</i>                    | LOC_Os01g54490          |
| <i>SbCN15</i>       | Sb10g003940                 | chr_10: 3464074<br>- 3465644  | <i>ZCN15</i>      | GRMZM2G051338            | <i>FTL2</i><br>( <i>Hd3a</i> ) | LOC_Os06g06320          |

\* Gene Locus IDs in Sorghum, Maize and Rice are from Phytozome v9.1 (<http://www.phytozome.net/>).
