# Supplementary material for: CONSTANS is a photoperiod regulated activator of flowering in sorghum
Source: PubMed Central journal article supplement (PMC4046011; doi:10.1186/1471-2229-14-148), 2014-05-28

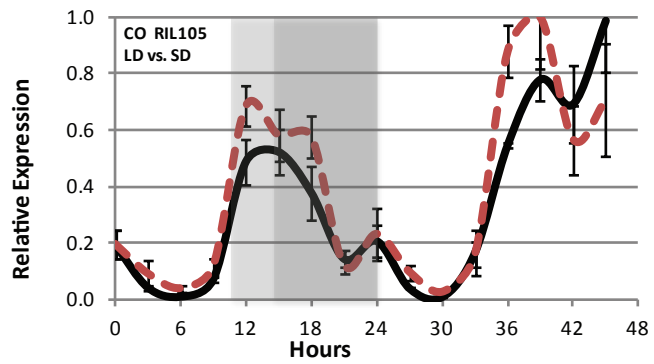

Supplement: 1471-2229-14-148-S5.pdf [file 1471-2229-14-148-S5.pdf]
