# Supplementary material for: CONSTANS is a photoperiod regulated activator of flowering in sorghum
Source: PubMed Central journal article supplement (PMC4046011; doi:10.1186/1471-2229-14-148), 2014-05-28
Supplement: 1471-2229-14-148-S6.pdf [file 1471-2229-14-148-S6.pdf]

**Table S3. Genotypes of genetic loci affecting flowering time in RIL112 and RIL105.**

| <b>FLW Locus (QTL)</b> | <b>Candidate Gene</b> | <b>RIL112 (allele origin)</b> | <b>RIL112 (allele type)</b> | <b>RIL105 (allele origin)</b> | <b>RIL105 (allele type)</b> |
|------------------------|-----------------------|-------------------------------|-----------------------------|-------------------------------|-----------------------------|
| Chr_01                 | <i>EHD1</i>           | BTx642                        | <i>Sbehd1-2</i>             | BTx642                        | <i>Sbehd1-2</i>             |
| Chr_06                 | <i>PRR37</i>          | BTx642                        | <i>Sbpr37-1</i>             | BTx642                        | <i>Sbpr37-1</i>             |
| Chr_06                 | <i>GHD7</i>           | BTx642                        | <i>Sbg7-1</i>               | BTx642                        | <i>Sbg7-1</i>               |
| Chr_08                 | ND*                   | BTx642                        | active                      | BTx642                        | active                      |
| Chr_10                 | <i>SbCO</i>           | BTx642                        | <i>Sbco-3</i>               | Tx7000                        | <i>SbCO-2</i>               |

\* ND: Not determined.
