# Supplementary material for: CONSTANS is a photoperiod regulated activator of flowering in sorghum
Source: PubMed Central journal article supplement (PMC4046011; doi:10.1186/1471-2229-14-148), 2014-05-28
Supplement: 1471-2229-14-148-S7.pdf [file 1471-2229-14-148-S7.pdf]

**Table S4. Primer sequences and amplification efficiency of primers used for qRT-PCR.**

| <b>Gene</b>   | <b>Locus ID in Sorghum*</b> | <b>Forward Primer</b>       | <b>Reverse Primer</b>      | <b>Amplification Efficiency in RIL105</b> | <b>Amplification Efficiency in RIL112</b> |
|---------------|-----------------------------|-----------------------------|----------------------------|-------------------------------------------|-------------------------------------------|
| <i>SbCO</i>   | Sb10g010050                 | CGGTACGGTTCTATGGTTCTG       | AACTACTTGTACTCGACCTTATC    | 0.82                                      | 0.79                                      |
| <i>SbEHD1</i> | Sb01g019980                 | CGTCAGGGAAGCAATGCCTTCAT     | CTTCAGTTGGAAAGCACACATCGC   | 0.88                                      | 0.81                                      |
| <i>SbCN8</i>  | Sb09g025760                 | AACTGTCAAAGGGAAGGTGGATCG    | GACTAAGCTCTCAACCTTCAAGTC   | 0.85                                      | 0.84                                      |
| <i>SbCN12</i> | Sb03g034580                 | TGCATGCATGAATATCGTCGTCT     | CCCGGGTAGTACATATAAGGTGGT   | 1.03                                      | 0.91                                      |
| <i>SbCN15</i> | Sb10g003940                 | GCTAGCTTATCCCGCATATTACCC    | CCACCCAAACTGCATCCACTTTGAA  | 0.83                                      | 0.80                                      |
| <i>SbGI</i>   | Sb03g003650                 | ATGCACCCGCTTCTAGTCATCTT     | TTCAGGGCTGTCATGGTTCCTCAT   | 0.85                                      | 0.84                                      |
| <i>SbTOC1</i> | Sb04g026190                 | GAGTGCAGATGATTACTGCTCACTTTG | TGCTGCCTTGTGCCAGTAGAAGA    | 0.78                                      | 0.79                                      |
| <i>SbLHY</i>  | Sb07g003870                 | GGCCTGCCTTACCATGAAGTTTA     | GCACTGCATTGCAAGGTTTGAAGTCC | 0.81                                      | 0.82                                      |

\* Gene Locus IDs in Sorghum are from Phytozome v9.1 (<http://www.phytozome.net/>).
